# Supplementary material for: Adaptive Governance and Resilience Capacity of Farms: The Fit Between Farmers’ Decisions and Agricultural Policies
Source: Frontiers journal article supplement (doi:10.3389/fenvs.2021.668836), 2021-06-14
Supplement: Data_Sheet_2.docx [file Data_Sheet_2.docx]

**APPENDIX 2**

**List of selected policy documents used for the policy level analysis**

European Commission, 2015. Fact Sheets. Rural Development Programme for Sweden, available at

<https://ec.europa.eu/agriculture/rural-development-2014-2020/country-files/se_en>.

European Commission, 2016a. Direct Payments 2015-2020. Decisions taken by Member States: State

of play as at June 2016, Information note., available at: <https://ec.europa.eu/agriculture/sites/agriculture/files/direct-support/directpayments/docs/simplementation-decisions-ms-2016_en.pdf>.

European Commission, 2016b. Direct Payments. The Young Farmer Payment Under Pillar I of the

Common Agricultural Policy- Choices and Decisions Taken by Member States, available at

<https://ec.europa.eu/agriculture/sites/agriculture/files/direct-support/direct-payments/docs/youngfarmer-payment_en.pdf>.

European Commission, 2016c. Mapping and Analysis of the Implementation of the CAP. Annex 1:

Description of the CAP Legislation. European Commission – DG Agriculture and Rural Development. Brussels, November 2016, available at <https://ec.europa.eu/agriculture/external-studies/mappinganalysis-implementation-cap_en>.

European Commission, 2016d. Mapping and Analysis af the Implementation Of The CAP. Annex 2:

Theoretical Analysis. European Commission – DG Agriculture and Rural Development. Brussels,

November 2016, available at <https://ec.europa.eu/agriculture/external-studies/mapping-analysisimplementation-cap_en>.

European Commission, 2016e. Mapping and Analysis of the Implementation of the CAP. Annex 3:

Mapping Report. European Commission – DG Agriculture and Rural Development Brussels,

November 2016, available at <https://ec.europa.eu/agriculture/external-studies/mapping-analysisimplementation-cap_en>.

European Commission, 2016f. Mapping and Analysis of the Implementation of the CAP. Final Report, EUR 2016.1365 EN. European Commission – DG Agriculture and Rural Development. Brussels,

November 2016, available at <https://ec.europa.eu/agriculture/external-studies/mapping-analysisimplementation-cap_en>.

Jordbruksverket, 2017. Attraktiv Landsbygd Nationell Handlingsplan för Landsbygdsprogrammet 2014-2020 år 2017. Diarienummer: 3.2.17-9326/16, Jönköping, Sverige.

Jordbruksverket, 2018a. Attraktiv Landsbygd Nationell Handlingsplan för Landsbygdsprogrammet

2014-2020 för år 2018. Diarienummer: 3.2.17-18196/17, Jönköping, Sverige.

Regeringskansliet, 2014. Gårdsstödet 2015–2020, – Förslag till Svenskt Genomförande, Ds 2014:6, available at, <https://www.regeringen.se/rattsliga-dokument/departementsserien-och-promemorior/2014/01/gardsstodet-2015-2020/>.

Regeringskansliet, 2015. Sweden - Rural Development Programme (National) version 3.1. CCI

2014SE06RDNP001, available at, <https://www.regeringen.se/informationsmaterial/2015/12/a-rural-development-programme-for-sweden/>.
